# 1 Coordination difficulties, IQ and psychopathology in 2 children with high-risk Copy Number Variants

3 Adam C Cunningham<sup>1</sup>, Jeremy Hall<sup>1</sup>, Michael J Owen<sup>1</sup>, Marianne B M van den Bree<sup>1</sup>.

4 <sup>1</sup> MRC Centre for Neuropsychiatric Genetics and Genomics, Division of Psychological

5 Medicine and Clinical Neurosciences, Cardiff University School of Medicine, Cardiff, UK.

6 **Address correspondence to:** Professor Marianne van den Bree, Institute of Psychological

7 Medicine and Clinical Neurosciences, Cardiff University School of Medicine, Hadyn Ellis

8 Building, Maindy Road, Cathays, Cardiff, CF24 4HQ, [vandenBreeMB@cardiff.ac.uk]

9 **Conflicts of Interest:** None

10 **Funding:** This research was funded by the Medical Research Council (MR/N022572/1 and

11 MR/L011166/1) and Doctoral Training Grant (MR/K51347/1), by the Baily Thomas Charitable

12 Trust (2315/1), the Waterloo Foundation (918-1234), a Wellcome Trust ISSF grant, the

13 National Institute for Mental Health (5UO1MH101724), Wellcome Trust Strategic Award

14 (503147), Health & Care Research Wales (Welsh Government, 507556), Medical Research

15 Council Centre grant (G0801418) and Medical Research Council Programme grant

16 (G0800509).

17 **Ethical Standards:** The authors assert that all procedures contributing to this work comply

18 with the ethical standards of the relevant national and institutional committees on human

19 experimentation and with the Helsinki Declaration of 1975, as revised in 2008

20 **Word count:** 4,252

21

## 22 **Abstract**

### 23 **Background:**

24 The prevalence and impact of motor coordination difficulties in children with Copy Number  
25 Variants that are associated with high risk of neurodevelopmental disorder (ND-CNVs) remain  
26 unknown. The present study aims to advance understanding of motor coordination  
27 difficulties in children with ND-CNVs and establish relationships with IQ and psychopathology.

### 28 **Methods:**

29 169 children with a ND-CNV (67% male, median age 8.88 years, range 6.02-14.81) and 57  
30 closest-in-age unaffected siblings (controls; 55% male, median age 10.41 years, SD=3.04,  
31 range 4.89-14.75) were assessed with the Developmental Coordination Disorder  
32 Questionnaire, alongside psychiatric interviews, and standardised assessments of IQ.

### 33 **Results:**

34 91% of children with an ND-CNV screened positive for coordination problems, compared to  
35 19% of unaffected sibling controls (OR=42.53,  $p<.001$ ). There was no difference in  
36 coordination ability between ND-CNV genotypes ( $F=1.47$ ,  $p=.184$ ). Poorer motor coordination  
37 in the ND-CNV group was associated with greater numbers of ADHD ( $p=.021$ ) and autism  
38 spectrum disorder trait ( $p<.001$ ) symptoms, along with lower full-scale ( $p=.011$ ), performance  
39 ( $p=.015$ ), and verbal IQ ( $p=.036$ ). Mediation analysis indicated that coordination ability was a  
40 full mediator of anxiety symptoms (69% mediated,  $p=.012$ ), and a partial mediator of ADHD  
41 (51%,  $p=.001$ ) and ASD trait symptoms (66%,  $p<.001$ ) along with FSIQ (40%,  $p=.002$ ) PIQ (40%,  
42  $p=.005$ ) and VIQ (38%,  $p=.006$ ) scores.

### 43 **Conclusions:**

44 The findings indicate that poor motor coordination is highly prevalent and closely linked to  
45 risk of mental health disorder and lower intellectual function. Future research should explore  
46 whether early interventions for poor coordination ability could ameliorate  
47 neurodevelopmental risk more generally.

## 48 **Background**

49 Difficulties with motor skills can have serious consequences for a child's independence and  
50 daily functioning (Van der Linde et al., 2015) and there is evidence that these negative effects  
51 can persist into adulthood (Kirby, Sugden, & Purcell, 2014; Kirby, Williams, Thomas, & Hill,  
52 2013).

53

54 Difficulties with co-ordinated movement are often seen in combination with other  
55 neurodevelopmental disorders such as ADHD and autism spectrum disorder (ASD). For  
56 example, it has been estimated that up to 50% of children with Developmental Coordination  
57 Disorder (DCD), a neurodevelopmental disorder characterised by functional difficulties with  
58 coordinated movement, also possess a diagnosis of ADHD, usually of the inattentive subtype  
59 (Kadesjö & Gillberg, 1999; Kaiser, Schoemaker, Albaret, & Geuze, 2015). Individuals with DCD  
60 also often show problems in neurocognition, particularly in executive functioning (Wilson,  
61 Riddock, Smits-Engelsman, Polatajko, & Blank, 2013).

62

63 A range of genomic disorders such as those caused by sub-microscopic deletions or  
64 duplications of chromosomal regions including 1q21.1, 16p11.2 or 22q11.2 have been  
65 associated with the development of conditions such as ADHD, ASD, schizophrenia and  
66 intellectual disability (Torres, Barbosa, & Maciel, 2015). These chromosomal abnormalities

67 are termed Copy Number Variants (CNVs), as they change the number of copies of genes  
68 contained on the affected area of the chromosome. While there is strong evidence that many  
69 CNVs are associated with a high risk of developing neurodevelopmental disorder (ND),  
70 including psychopathology (referred to hereafter as ND-CNVs), penetrance is often  
71 incomplete and variable. This means that while some individuals will display many complex  
72 symptoms, others may show few or none (Crawford et al., 2018).

73

74 Previous research by our group has found that approximately 80% of children with 22q11.2  
75 Deletion Syndrome (22q11.2DS) show poor coordination of movement (Cunningham et al.,  
76 2017). Our findings also indicated that the children who showed poorer motor coordination  
77 had higher risks of ADHD, ASD and anxiety symptoms and lower mean IQ. However, there is  
78 very little research into coordination difficulties in children with other ND-CNVs. It is therefore  
79 unclear if individuals with other ND-CNVs experience similar coordination difficulties, or if  
80 certain ND-CNVs confer greater risk for coordination difficulties than others. Similarly, it is  
81 unknown if the links between coordination difficulties and other neurodevelopmental  
82 symptoms that we found for 22q11.2DS are also present on other high-risk ND-CNVs. More  
83 generally, the links between coordination difficulties and other neurodevelopmental  
84 problems are not well understood.

85

86 Finally, it is not known to what extent motor coordination disorder mediates the effects of  
87 carrying a ND-CNV on subsequent neurodevelopmental impairment. This idea is supported  
88 by theories that the early development of motor skills influences the development of other  
89 higher cognitive processes (Wilson, 2002). Motor skills develop very early in life and it follows  
90 that difficulties with interacting with and exploring one's environment impact on the

91 development of other skills. For example, it has been suggested that poor motor development  
92 will impact on skills such as the representation of abstract concepts (Piaget, 1954),  
93 mathematics (Giles et al., 2018), and language ability (Rowe, Özçalışkan, & Goldin-Meadow,  
94 2008).

95

96 With these ideas in mind, we assessed motor coordination, IQ and psychopathology in a large  
97 group of children with CNVs associated with the development of neurodevelopmental  
98 disorder in order to test the following hypotheses: 1) Children with ND-CNVs have an  
99 increased rate of motor coordination difficulties compared to unaffected sibling controls. We  
100 base this hypothesis on research where neurodevelopmental problems have been found to  
101 be associated with increased risk of motor coordination difficulties in non-genotyped samples  
102 (Kadesjö & Gillberg, 1999; Kaiser et al., 2015; Pratt & Hill, 2011; Skirbekk, Hansen, Oerbeck,  
103 Wentzel-Larsen, & Kristensen, 2012; Sumner, Leonard, & Hill, 2016), as well as evidence from  
104 22q11.2DS (Cunningham et al., 2017); 2) Motor coordination ability will differ across  
105 genotypes, as different ND-CNV's affect different genes in different areas of the genome; 3)  
106 Poor coordination will be related to increased levels of psychopathology and lower IQ in  
107 children with ND-CNVs, similar to the pattern seen in non-CNV populations (Harrowell,  
108 Hollén, Lingam, & Emond, 2017; P. H. Wilson et al., 2013) as well as 22q11.2DS (Cunningham  
109 et al., 2017) and; 4) The risk of psychopathology and low IQ posed by carrying a ND-CNV is  
110 partially indirect, via motor coordination ability, or in other words, motor coordination ability  
111 will mediate the relationship between ND-CNV status and psychopathology and IQ. This  
112 hypothesis is supported by findings that appropriate development of motor skills is required  
113 for the development of higher-order cognitive skills (Giles et al., 2018; Rowe et al., 2008;  
114 Wilson, 2002).

## 115 **Methods**

### 116 **Participants**

117 One-hundred and sixty-nine participants with a range of ND-CNVs took part (67% male,  
118 median age: 8.88 years, range: 6.02-14.81, see Supplementary Table 1 for CNVs included), as  
119 well as 57 closest-in-age unaffected siblings (controls; 54% male, median age: 1.41 years,  
120 range: 5.89-14.75). Families were recruited through UK Medical Genetics clinics as well as  
121 word of mouth and the charities Unique and MaxAppeal!. Informed and written consent was  
122 obtained prior to recruitment from the carers of the children and recruitment was carried out  
123 in agreement with protocols approved by the London Queens Square NRES Committee.  
124 Individual ND-CNV genotypes were established from medical records as well as in-house  
125 genotyping at the Cardiff University MRC Centre for Neuropsychiatric Genetics and Genomics  
126 using microarray analysis. Information about medical comorbidities including congenital  
127 heart defects, epilepsy, and premature birth, along with medication use.

128

### 129 **Functional coordination impairment- The Developmental Coordination Disorder**

#### 130 **Questionnaire (DCDQ)**

131 The DCDQ (Wilson et al., 2009) was completed by the primary carer. It is designed to screen  
132 for functional motor coordination impairments in children 5–15 years old. The DCDQ is widely  
133 used and validated (Cunningham et al., 2017; Wilson et al., 2009). In general, lower scores  
134 indicate greater coordination difficulties. Items probe fine and gross motor skills. It yields a  
135 total score as well as separate scores for three subscales: control during movement, fine  
136 motor/handwriting and general coordination. The total score was used as a continuous  
137 measure of coordination ability. In addition, participants were categorised into those with

138 poor coordination, (scoring positive on the DCDQ) and those without (scoring negative) using  
139 age dependant scoring thresholds.

140

#### 141 **IQ assessment**

142 Full scale, verbal and performance IQ (FSIQ, VIQ and PIQ) was obtained by administering the  
143 Wechsler Abbreviated Scale of Intelligence (Four subtests: matrix reasoning, block design,  
144 vocabulary, similarities) (WASI) (Wechsler, 1999).

145

#### 146 **Psychiatric assessment**

147 The social communication questionnaire (SCQ) (Rutter, Bailey, & Lord, 2003a) was used to  
148 screen for ASD trait symptoms. A score of 15 or greater is considered suggestive of ASD  
149 (Rutter, Bailey, & Lord, 2003b). The SCQ consists of three subscales: repetitive behaviour,  
150 social interactions and communication and scores across these can be combined to obtain a  
151 total score.

152

153 ADHD, anxiety and ODD symptoms were assessed using the semi-structured Child and  
154 Adolescent Psychiatric Assessment (CAPA) (Angold et al., 2009). The interview was conducted  
155 by trained psychologists with the primary caregiver. Interviews were audiotaped, and DSM-5  
156 diagnosis obtained during consensus meetings led by a child and adolescent psychiatrist. We  
157 did not consider diagnoses to be mutually exclusive. Anxiety symptoms included any  
158 symptom of generalised anxiety disorder, social phobia, specific phobia, separation anxiety,  
159 panic disorder with and without agoraphobia, agoraphobia and obsessive-compulsive  
160 disorder.

161

162 **Statistical analysis**

163 In order to investigate the effect of having an ND-CNV on rates of screening positive for  
164 coordination problems, we carried out a chi-squared test comparing rates of positive and  
165 negative screening between each group.

166

167 Additionally, to investigate coordination ability (DCDQ score) we conducted a linear mixed  
168 effect model where the continuous DCDQ total score was predicted by ND-CNV status with  
169 age as a covariate, and family membership as a random effect, as the children with ND-CNVs  
170 and controls were siblings.

171

172 As a sensitivity analysis, this mixed effect model was also run with gender, maternal  
173 education, family income, presence of congenital heart defects, epilepsy, premature birth and  
174 medication use as additional covariates, in order to identify if these variables should be  
175 included as covariates in subsequent analyses.

176

177 An ANCOVA was used to investigate the extent to which DCDQ total score was explained by  
178 ND-CNV genotype. These analyses were based on the ND-CNV groups with 10 or more  
179 individuals available (15q11.2 deletion, 15q13.3 deletion, 16p11.2 deletion, 16p11.2  
180 duplication, 1q21.1 deletion, 1q21.1 duplication, 22q11.2 deletion, 22q11.2 duplication and  
181 2p16.3 deletion (NRXN1)). Age was entered as covariates. A similar ANCOVA was used to  
182 investigate the effect of deletion or duplication of genetic material across the ND-CNV group,  
183 with age.

184



185 In order to investigate the relationship between DCDQ score and psychopathology or IQ in  
186 children with CNVs, hierarchical regression models were constructed where DCDQ total score  
187 was predicted first by age, then the relevant psychopathology or IQ variable at the second  
188 step. For the analysis including IQ, we ran models with both standardised IQ (i.e, full scale IQ,  
189 verbal IQ and performance IQ scores) as well as raw IQ subtest scores. The latter were  
190 included because of the potential for coordination ability to impact on IQ test performance,  
191 particularly in the block design task, where scores are assigned based on time taken to  
192 complete patterns. Poor for age motor ability may impede performance on this task, as  
193 constructing the patterns may take longer, even if the method is correct.

194

195 Additionally, mediation analyses (Baron & Kenny, 1986) were run to investigate whether the  
196 relationship between ND-CNV status and psychopathology or IQ scores were mediated by  
197 motor coordination ability with age as a covariates (Figure 1). The R package “mediation”  
198 v4.4.7 (Tingley, Yamamoto, Hirose, Keele, & Imai, 2014) was used to conduct the mediation  
199 analyses. This provides point estimates of the average causal mediation effects (ACME),  
200 average direct effects (ADE) and total effects (ADE+ACME) and the proportion of the total  
201 effects that are accounted for by the indirect path (proportion mediated). ACME corresponds  
202 to the indirect effect through the mediator, while the ADE corresponds to the direct effect of  
203 the independent variable on the outcome. Confidence intervals and p-values were obtained  
204 using nonparametric bootstrapping with 5000 simulations (Imai, Keele, & Tingley, 2010). The  
205 results of the analysis can be interpreted in the following ways, if a significant total effect, and  
206 direct effect (ADE) but insignificant indirect effect (ACME) are found, the mediator has no  
207 effect on the outcome. If a significant total effect, significant indirect effect, but insignificant  
208 direct effect is found, the mediator is fully mediating the effect of the independent variable

209 on the outcome. Finally, if a significant total effect, and significant direct and indirect effects  
210 are found, the mediating variable is a partial mediator of the effect of the independent  
211 variable on the outcome. Importantly, if the total effect is not significant, there is no evidence  
212 that the independent variable has an effect on the outcome.

213

214 To validate that the mediation analyses was robust to the path being investigated, a second  
215 set of models investigating if FSIQ mediated the effect of ND-CNV status on psychopathology  
216 were also constructed and tested using the same method.

217

218 Sensitivity analyses were carried out to ensure that indirect effects were robust to violations  
219 of the assumption of sequential ignoreability (effect of unmeasured confounding variables).

220 For these sensitivity analyses, the level of confounding due to unmeasured confounders was  
221 represented by the correlation between the residuals (error terms) from the mediator and

222 the outcome models, denoted  $\rho$  (rho). If  $\rho=0$  there is no correlation between residuals, and

223 this can be interpreted as no unmeasured confounding. By varying levels of  $\rho$  between values

224 of -1 and +1 we can explore how any detected indirect effect is influenced by unmeasured

225 confounders. The key outcome of these sensitivity analyses is the level of  $\rho$  for which the

226 indirect effect becomes nonsignificant, giving a measure of how strong the effect of any

227 unmeasured confounding variables would need to be in order to invalidate the estimated

228 indirect effect (ACME).

229

230 All analyses were carried out on Mac OSX and R v3.5.3. Number of individuals with

231 information for each assessment may differ, due to not successfully completing assessments.

232

## 233 Results

234 Descriptive statistics for the individuals that took part is presented in Table 1. The ND-CNV  
235 group was significantly younger than the unaffected sibling controls but had a similar  
236 proportion of males and females. Due to this difference in age between the groups, and the  
237 fact that DCDQ total score was correlated with age ( $r=.26$ ,  $p<.001$ ) in children with an ND-  
238 CNV, age was included as a covariate in all analyses.

239

240 Eight children with an ND-CNV were receiving sodium valproate for epilepsy, six were  
241 receiving methylphenidate, three were taking carbamazepine, three were on risperidone,  
242 two atomoxetine, two on levetiracetam, one on clobazam, two on ethosuximide, one on  
243 clobazam, one on lamotrigine, one on fluvoxamine, one on guanfacine, one on fluoxetine and  
244 one on nitrazepam. No other relevant medication use was noted. Notably, 54% of children  
245 with an ND-CNV were born before 37 weeks, 54% had a congenital heart defect, and 16%  
246 reported a history of seizures.

247

248 **Hypothesis 1: Is there a difference in rates of indicated DCD between CNV carriers and**  
249 **Controls?**

250 Ninety-one percent (154/169) of children with an ND-CNV and 19% (14/72) controls screened  
251 positive for coordination problems ( $OR=42.53$ ,  $\chi^2=122.86$ ,  $p<.001$ ).

252

253 Children with an ND-CNV had lower DCDQ total scores than controls (Table 1), and a linear  
254 mixed model where DCDQ total score was predicted by ND-CNV status and age with family

255 membership as a random effect, found that ND-CNV status was predictive of DCDQ total score  
256 ( $b=28.98$ ,  $p<.001$ ), along with age ( $b=0.78$ ,  $p=.022$ ) were predictive of DCDQ total score.

257

258 Addition of gender, family income, maternal education, or CHD, epilepsy, premature birth or  
259 medication use in the mixed effect models as covariates revealed that they had no effect on  
260 screening for coordination problems or DCDQ score. Therefore, these were not included as  
261 covariates in any subsequent analyses.

262

263 Across all ND-CNV genotypes we studied, rates of coordination problems were high, with the  
264 lowest rate (77.8%) found in children with 15q13.3 duplication, whilst all (100%) children with  
265 15q11.2 duplication, 16p11.2 distal duplication, 16p11.2 duplication, 1q21.1 deletion, 1q21.1  
266 duplication, 22q11.2 distal deletion, deletion of 9q34.3 (Kleefstra Syndrome), TAR deletion  
267 and TAR duplication screened positive (Supplementary Table 1).

268

## 269 **Hypothesis 2: Does coordination score differ by genotype?**

270 After including age, ND-CNV genotype was not a significant predictor of DCDQ score ( $F=1.47$ ,  
271  $df=7$ ,  $p=.184$ ,  $\eta^2=.069$ ) in those ND-CNV groups with 10 individuals or more. These findings  
272 are consistent with the null hypothesis that coordination ability is similar regardless of ND-  
273 CNV genotype. In addition, type of CNV, (deletion ( $n= 101$ ) or duplication ( $n=68$ )) of material  
274 also had no effect on DCDQ score. ( $F=.67$ ,  $df=1$ ,  $p=.413$ ,  $\eta^2=.003$ )

275

276 **Hypothesis 3: Is coordination related to psychopathology and IQ in children with an ND-**  
277 **CNV?**

278 Children with ND-CNV's displayed higher levels of psychopathology symptoms than siblings  
279 (Table 1). When investigating the links between coordination difficulties and psychopathology  
280 within the ND-CNV group, we found that worse coordination ability was associated with a  
281 greater number of ADHD, and ASD traits, but not anxiety or ODD symptoms. In all models,  
282 age was a significant covariate, with older children having better coordination ability (Table  
283 2).

284

285 Average FSIQ, PIQ and VIQ were lower in the ND-CNV group (Table 1). Within children with  
286 ND-CNV's, worse coordination was associated with lower FSIQ, PIQ and VIQ, with age as a  
287 significant covariate (Supplementary Table 2 A-C). When investigating if DCDQ score was  
288 associated with individual raw subtest scores, we found that better matrix reasoning, but not  
289 block design, similarities or vocabulary performance was associated with better coordination  
290 (Supplementary Table 2 D-G).

291

292 **Hypothesis 4: Do coordination difficulties mediate the relationship between ND-CNV group**  
293 **status and psychopathology or IQ?**

294 Mediation analysis indicated that coordination ability (DCDQ score) was a full mediator of the  
295 effect of having and ND-CNV on anxiety symptoms (69% proportion mediated) and was a  
296 partial mediator of ADHD symptoms (51% proportion mediated) and ASD traits (66%  
297 proportion mediated). While no evidence for mediation was found for ODD symptoms (Table  
298 3.).

299

300 Sensitivity analysis indicated that while the detected mediating effect of coordination ability  
301 on ASD traits was robust to unmeasured confounding variables ( $\rho > .49$ ), the detected  
302 mediating effects on ADHD symptoms and anxiety symptoms was sensitive to unmeasured  
303 confounders, with small correlations ( $\rho > .24$  for both the ADHD and anxiety models) between  
304 unmeasured confounding variables and outcome variables (ADHD or anxiety symptoms)  
305 being sufficient to invalidate the detected mediating effect.

306

307 Mediation analysis also revealed that coordination ability was a partial mediator of FSIQ, PIQ  
308 and VIQ scores, mediating 40% of the effect of having an ND-CNV on FSIQ, and PIQ, and 38%  
309 of the effect on VIQ (Table 4).

310

311 However, these analyses were sensitive to confounding with small correlations between  
312 unmeasured confounding variables and FSIQ ( $\rho > .21$ ), VIQ ( $\rho > .17$ ), and PIQ ( $\rho > .19$ ) being  
313 sufficient to invalidate the detected mediation findings.

314

315 Previous studies have found no evidence that IQ is associated with levels of psychopathology  
316 in children with an ND-CNV (Niarchou et al., 2014) . In order to validate that the mediation  
317 analyses were robust to the variable used as a mediator, we constructed a second set of  
318 models where FSIQ was included instead of coordination ability as a mediator of the effect of  
319 ND-CNV status on psychopathology. In agreement with the previous findings, we found no  
320 evidence that FSIQ was a mediator of ADHD (ACME=.25,  $p=.549$ ), ASD trait (ACME=.44,  
321  $p=.466$ ), anxiety (ACME=.22,  $p=.574$ ), or ODD symptoms (ACME=.44,  $p=.478$ ).

322

## 323 Discussion

324 This study shows that difficulties with coordination are common in children with ND-CNVs,  
325 with the great majority (91%) of children with an ND-CNV screening positive for coordination  
326 problems. We also present evidence that coordination ability is associated with increased  
327 ADHD and ASD traits, and lower FSIQ, PIQ and VIQ scores. Coordination difficulties were  
328 elevated across all ND-CNV genotypes and genotype or CNV type (deletion or duplication)  
329 was not a significant predictor of coordination ability. Importantly, we present evidence that  
330 coordination ability is a partial mediator of the effect of ADHD symptoms and ASD traits, along  
331 with FSIQ, PIQ and VIQ, and a full mediator of anxiety symptoms, while we found no evidence  
332 for mediation of ODD symptoms.

333

334 The high rates of coordination difficulties across genotypes, and lack of specificity of ND-CNV  
335 genotype on coordination ability, indicates that neuromotor deficits are a common outcome  
336 across ND-CNVs. We found no evidence for an effect of gender on coordination ability, which  
337 differs from studies in the general population where DCD is more commonly seen in boys  
338 (Missiuna et al., 2008; Tsiotra et al., 2006). It is important to note that rates of premature  
339 birth were also high in the ND-CNV group at 54%, Prematurity has been linked to delays in  
340 motor development, and coordination difficulties later in life (Edwards et al., 2011; Goyen &  
341 Lui, 2009), but we found no effect of prematurity on either screening positive for coordination  
342 problems or overall coordination ability. Additionally, while 19% of controls screened positive  
343 for coordination problems, this is within the range of prevalence estimates for developmental  
344 coordination disorder in the general population, which has been reported as ranging from 2%-  
345 20%, depending on criteria used (Blank et al., 2019).

346

347 Considering links with psychopathology, children with a ND-CNV showed elevated ADHD, ASD  
348 trait, anxiety and ODD symptoms compared to controls. Within the ND-CNV group, higher  
349 numbers of ADHD, and ASD symptoms were associated with greater motor coordination  
350 difficulties, but this was not the case for anxiety or ODD. These results are similar to research  
351 in non-genotype selective samples, where high rates of coordination difficulties have been  
352 observed in children with ADHD (Waternberg, Waiserberg, Zuk, & Lerman-Sagie, 2007) and/or  
353 ASD (Sumner et al., 2016), but differ from findings in children with 22q11.2 deletion, where  
354 an association with anxiety was found (Cunningham et al., 2017).

355

356 Additionally, coordination difficulties were found to be a partial mediator of the effect of ND-  
357 CNV status on ADHD symptoms and ASD traits and a full mediator of anxiety symptoms. No  
358 evidence for mediation was found for ODD symptoms. These results may suggest that  
359 coordination difficulties are intrinsically linked to the development of ADHD, ASD and anxiety  
360 symptoms, but not ODD symptoms, at least in individuals with a ND-CNV.

361 However it is important to note that the identified mediating effects on ADHD and anxiety  
362 symptoms may need to be viewed with caution, as relatively low correlations between any  
363 unmeasured (and therefore not accounted for in the mediation models) confounding variable  
364 and either ADHD or anxiety symptoms would be sufficient to invalidate the findings.

365

366 Importantly, there was no evidence found for mediation of the effect of having an ND-CNV  
367 on psychopathology by FSIQ. The lack of a mediating effect of FSIQ on psychopathology also  
368 agrees with previous work in 22q11.2 deletion, where it was found that FSIQ was not



369 associated with levels of psychopathology (Niarchou et al., 2014). This helps us validate that  
370 our mediation analysis is not prone to detecting false positive mediating effects.

371

372 Poor coordination was also found to be associated with FSIQ, VIQ and PIQ in the ND-CNV  
373 group. This agrees with previous studies of children with coordination difficulties, not  
374 selected due to genotype, and with previous research in 22q11.2DS (Cunningham et al., 2017;  
375 Roizen et al., 2011), where associations between FSIQ and motor performance have been  
376 found. The presented results, and previous research in 22q11.2DS, support the idea that  
377 within ID populations, level of intellectual impairment is associated with poorer motor  
378 coordination (Vuijk, Hartman, Scherder, & Visscher, 2010). It may be of note that we found  
379 significant associations between coordination ability and raw scores on the matrix reasoning  
380 task, while no relationships were found between coordination ability and the block design,  
381 vocabulary or similarities tasks. Mediation analysis also found that coordination ability was a  
382 partial mediator of the effect of ND-CNV status on FSIQ, VIQ and PIQ. This agrees with theories  
383 that suggest that motor skills are required for the development of higher order cognitive skills,  
384 such as mathematical ability (Giles et al., 2018), which would be accounted for in PIQ, or  
385 language development (Rowe et al., 2008) as accounted for by VIQ.

386

387 A number of different interpretations of our mediation findings are possible. First, aberrant  
388 development of motor coordination skills as a consequence of a ND-CNV may have cascading  
389 impacts on later development of other skills, like cognition, attention and social functioning.  
390 Second, motor coordination difficulties trigger environmental risk factors, such as social  
391 exclusion and bullying, which may increase risk of psychopathology. Thirdly, both motor  
392 coordination problems and impairment in IQ and psychopathology may be the result of the

393 same underlying genetic cause (pleiotropy), although the manifestation of the symptoms may  
394 occur at different stages during development. Such pleiotropic effects probably impact on  
395 brain development. For example, the cerebellum has been shown to be important in many  
396 motor as well as non-motor functions (Miall, Reckess, & Imamizu, 2001; Stoodley, 2016) and,  
397 therefore, damage to this region has cross domain effects. It is also possible that multiple  
398 processes account for the findings, possibly at different developmental stages and in different  
399 ways for each trait. It is for example noteworthy that we did not find evidence of mediation  
400 of motor coordination problems for ODD.

401

402 We are not able to further distinguish between these hypotheses in the current study, and  
403 the cross-sectional design does not allow for insights into order of appearance of different  
404 impairments, but delays in motor development are often observed from very early in  
405 development. It would be fruitful to conduct a randomised control trial where an intervention  
406 for motor coordination difficulties is delivered at an early age to a high-risk group of children  
407 with ND-CNVs and changes in psychopathology and cognitive function are established.

408

409 This is the only study to investigate the relationships between coordination difficulties and  
410 psychopathology and IQ in children with CNV's that confer risk for psychiatric disorders. The  
411 presence of sibling controls for comparison, and detailed assessment of psychopathology are  
412 additional strengths. However, the DCDQ is a measure of overall coordination that is  
413 completed by a parent, and it therefore cannot allow for direct insights to be gained into  
414 underlying sensorimotor deficits that are present in the individual children. To address this,  
415 further research should investigate the quality of movement (kinematics), using detailed  
416 assessment of fundamental motor control processes. An additional limitation was that the

417 control group was significantly older than the ND-CNV group. However, this should have had  
418 limited effect on screening positive or negative for coordination problems, as parents are  
419 always asked to rate children with respect to their peers, and screening is based on age  
420 dependant thresholds. Younger children require lower scores to screen positive than older  
421 children, allowing for a degree of internal control for improvements in ability due to age. In  
422 addition, age was included as a covariate in all analyses. Finally, it was not possible to conduct  
423 full neurological assessments on the children. Therefore, we cannot rule out other  
424 contributing physical or neurological problems that would affect coordination.

425

426 In summary, we found very high rates of coordination difficulties in children with CNVs that  
427 are associated with risk of neurodevelopmental disorder and which constitute a significant  
428 portion of the caseload of clinical geneticists. These problems were elevated across all ND-  
429 CNV genotypes and associated with risk of IQ impairment and psychopathology. Furthermore,  
430 the association between ND-CNVs and anxiety symptoms was fully mediated by coordination  
431 ability, while the association between having an ND-CNV and lower FSIQ, PIQ, and VIQ scores,  
432 along with ADHD symptoms and ASD traits was partially mediated by coordination ability. The  
433 immediate clinical implication of these findings should be increased vigilance for motor  
434 impairments in children with ND-CNVs that are associated with mental health disorders, so  
435 that appropriate support can be introduced as early as possible. It may be that motor  
436 interventions could help the development of cognitive skills and reduce risk for the  
437 development of psychopathology.

438

439 **Acknowledgements:** We are very grateful for all the families that took part in the IMAGINE-  
440 ID study. We would like to thank Dr Samuel Chawner for valuable input and help. We would

441 also like to thank the Core Services team at the MRC Centre for Neuropsychiatric Genetics  
442 and Genomics. The work was carried out in collaboration with the National Centre for  
443 Mental Health, a collaboration between Cardiff, Swansea and Bangor Universities and  
444 funded by Health & Care Research Wales (Welsh Government).

## 445 **References**

- 446 Angold, A., Prendergast, M., Cox, A., Harrington, R., Simonoff, E., & Rutter, M. (2009). The  
447 Child and Adolescent Psychiatric Assessment (CAPA). *Psychological Medicine*, 25(04),  
448 739. <https://doi.org/10.1017/S003329170003498X>
- 449 Baron, R. M., & Kenny, D. A. (1986). The moderator–mediator variable distinction in social  
450 psychological research: Conceptual, strategic, and statistical considerations. *Journal*  
451 *of Personality and Social Psychology*, 51(6), 1173–1182.  
452 <https://doi.org/10.1037/0022-3514.51.6.1173>
- 453 Blank, R., Barnett, A. L., Cairney, J., Green, D., Kirby, A., Polatajko, H., ... Vinçon, S. (2019).  
454 International clinical practice recommendations on the definition, diagnosis,  
455 assessment, intervention, and psychosocial aspects of developmental coordination  
456 disorder. *Developmental Medicine & Child Neurology*, 61(3), 242–285.  
457 <https://doi.org/10.1111/dmcn.14132>
- 458 Crawford, K., Bracher-Smith, M., Owen, D., Kendall, K. M., Rees, E., Pardiñas, A. F., ... Kirov,  
459 G. (2018). Medical consequences of pathogenic CNVs in adults: analysis of the UK  
460 Biobank. *Journal of Medical Genetics*, jmedgenet-2018-105477.  
461 <https://doi.org/10.1136/jmedgenet-2018-105477>
- 462 Cunningham, A., Delpont, S., Cumines, W., Busse, M., Linden, D., Hall, J., ... van den Bree, M.  
463 (2017). Developmental coordination disorder, psychopathology and IQ in 22q11.2

- 464 deletion syndrome. *The British Journal of Psychiatry*, 212(01), 27–33.
- 465 <https://doi.org/10.1192/bjp.2017.6>
- 466 Edwards, J., Berube, M., Erlandson, K., Haug, S., Johnstone, H., Meagher, M., ... Zwicker, J. G.
- 467 (2011). Developmental coordination disorder in school-aged children born very
- 468 preterm and/or at very low birth weight: a systematic review. *Journal of*
- 469 *Developmental and Behavioral Pediatrics : JDBP*, 32(9), 678–687.
- 470 <https://doi.org/10.1097/DBP.0b013e31822a396a>
- 471 Giles, O. T., Shire, K. A., Hill, L. J. B., Mushtaq, F., Waterman, A., Holt, R. J., ... Mon-Williams,
- 472 M. (2018). Hitting the Target: Mathematical Attainment in Children Is Related to
- 473 Interceptive-Timing Ability. *Psychological Science*, 29(8), 1334–1345.
- 474 <https://doi.org/10.1177/0956797618772502>
- 475 Goyen, T. A., & Lui, K. (2009). Developmental coordination disorder in “apparently normal”
- 476 schoolchildren born extremely preterm. *Arch Dis Child*, 94(4), 298–302.
- 477 <https://doi.org/10.1136/adc.2007.134692>
- 478 Harrowell, I., Hollén, L., Lingam, R., & Emond, A. (2017). Mental health outcomes of
- 479 developmental coordination disorder in late adolescence. *Developmental Medicine*
- 480 *& Child Neurology*, 59(9), 973–979. <https://doi.org/10.1111/dmcn.13469>
- 481 Imai, K., Keele, L., & Tingley, D. (2010). A general approach to causal mediation analysis.
- 482 *Psychological Methods*, 15(4), 309–334. <https://doi.org/10.1037/a0020761>
- 483 Kadesjö, B., & Gillberg, C. (1999). Developmental coordination disorder in Swedish 7-year-
- 484 old children. *Journal of the American Academy of Child and Adolescent Psychiatry*,
- 485 38(7), 820–828. <https://doi.org/10.1097/00004583-199907000-00011>
- 486 Kaiser, M.-L. M.-L. L., Schoemaker, M. M. M., Albaret, J.-M. J.-M. M., & Geuze, R. H. H.
- 487 (2015). What is the evidence of impaired motor skills and motor control among

- 488 children with attention deficit hyperactivity disorder (ADHD)? Systematic review of  
489 the literature. *Research in Developmental Disabilities*, 36, 338–357.  
490 <https://doi.org/10.1016/j.ridd.2014.09.023>
- 491 Kirby, A., Sugden, D., & Purcell, C. (2014). Diagnosing developmental coordination disorders.  
492 *Archives of Disease in Childhood*, 99(3), 292–296.  
493 <https://doi.org/10.1136/archdischild-2012-303569>
- 494 Kirby, A., Williams, N., Thomas, M., & Hill, E. L. (2013). Self-reported mood, general health,  
495 wellbeing and employment status in adults with suspected DCD. *Research in*  
496 *Developmental Disabilities*, 34(4), 1357–1364.  
497 <https://doi.org/10.1016/j.ridd.2013.01.003>
- 498 Miall, R. C., Reckess, G. Z., & Imamizu, H. (2001). The cerebellum coordinates eye and hand  
499 tracking movements. *Nature Neuroscience*, 4(6), 638–644.  
500 <https://doi.org/10.1038/88465>
- 501 Missiuna, C., Gaines, R., McLean, J., Delaat, D., Egan, M., & Soucie, H. (2008). Description of  
502 children identified by physicians as having developmental coordination disorder.  
503 *Developmental Medicine and Child Neurology*, 50(11), 839–844.  
504 <https://doi.org/10.1111/j.1469-8749.2008.03140.x>
- 505 Niarchou, M., Zammit, S., van Goozen, S. H., Thapar, A., Tierling, H. M., Owen, M. J., & van  
506 den Bree, M. B. (2014). Psychopathology and cognition in children with 22q11.2  
507 deletion syndrome. *Br J Psychiatry*, 204(1), 46–54.  
508 <https://doi.org/10.1192/bjp.bp.113.132324>
- 509 Piaget, J. (1954). *The construction of reality in the child*. <https://doi.org/10.1037/11168-000>

- 510 Pratt, M. L., & Hill, E. L. (2011). Anxiety profiles in children with and without developmental  
511 coordination disorder. *Research in Developmental Disabilities, 32*(4), 1253–1259.  
512 <https://doi.org/10.1016/j.ridd.2011.02.006>
- 513 Roizen, N. J., Higgins, A. M., Antshel, K. M., Fremont, W., Shprintzen, R., & Kates, W. R.  
514 (2011). 22q11.2 Deletion Syndrome: Are Motor Deficits More Than Expected for IQ  
515 Level? *The Journal of Pediatrics, 157*(4), 658–661.  
516 <https://doi.org/10.1016/j.jpeds.2010.04.073.22q11.2>
- 517 Rowe, M. L., Özçalışkan, Ş., & Goldin-Meadow, S. (2008). Learning words by hand: Gesture’s  
518 role in predicting vocabulary development. *First Language, 28*(2), 182–199.  
519 <https://doi.org/10.1177/0142723707088310>
- 520 Rutter, M., Bailey, A., & Lord, C. (2003a). *Social Communication Questionnaire*. Los Angeles,  
521 CA: Western Psychological Services.
- 522 Rutter, M., Bailey, A., & Lord, C. (2003b). *Social Communication Questionnaire*. Western  
523 Psychological Services.
- 524 Skirbekk, B., Hansen, B. H., Oerbeck, B., Wentzel-Larsen, T., & Kristensen, H. (2012). Motor  
525 impairment in children with anxiety disorders. *Psychiatry Research, 198*(1), 135–139.  
526 <https://doi.org/10.1016/j.psychres.2011.12.008>
- 527 Stoodley, C. J. (2016). The Cerebellum and Neurodevelopmental Disorders. *Cerebellum,*  
528 *15*(1), 34–37. <https://doi.org/10.1007/s12311-015-0715-3>
- 529 Sumner, E., Leonard, H. C., & Hill, E. L. (2016). Overlapping Phenotypes in Autism Spectrum  
530 Disorder and Developmental Coordination Disorder: A Cross-Syndrome Comparison  
531 of Motor and Social Skills. *Journal of Autism and Developmental Disorders, 46*(8),  
532 2609–2620. <https://doi.org/10.1007/s10803-016-2794-5>

- 533 Tingley, D., Yamamoto, T., Hirose, K., Keele, L., & Imai, K. (2014). mediation: R Package for  
534 Causal Mediation Analysis. *Journal of Statistical Software*, *59*(5), 1–38.
- 535 Torres, F., Barbosa, M., & Maciel, P. (2015). Recurrent copy number variations as risk factors  
536 for neurodevelopmental disorders: Critical overview and analysis of clinical  
537 implications. *Journal of Medical Genetics*. [https://doi.org/10.1136/jmedgenet-2015-](https://doi.org/10.1136/jmedgenet-2015-103366)  
538 103366
- 539 Tsiotra, G. D., Flouris, A. D., Koutedakis, Y., Faight, B. E., Nevill, A. M., Lane, A. M., &  
540 Skenteris, N. (2006). A Comparison of Developmental Coordination Disorder  
541 Prevalence Rates in Canadian and Greek Children. *Journal of Adolescent Health*,  
542 *39*(1), 125–127. <https://doi.org/10.1016/j.jadohealth.2005.07.011>
- 543 Van der Linde, B. W., van Netten, J. J., Otten, B., Postema, K., Geuze, R. H., & Schoemaker,  
544 M. M. (2015). Activities of Daily Living in Children With Developmental Coordination  
545 Disorder: Performance, Learning, and Participation. *Physical Therapy*, *95*(11), 1496–  
546 1506. <https://doi.org/10.2522/ptj.20140211>
- 547 Vuijk, P. J., Hartman, E., Scherder, E., & Visscher, C. (2010). Motor performance of children  
548 with mild intellectual disability and borderline intellectual functioning. *Journal of*  
549 *Intellectual Disability Research*, *54*(11), 955–965. [https://doi.org/10.1111/j.1365-](https://doi.org/10.1111/j.1365-2788.2010.01318.x)  
550 2788.2010.01318.x
- 551 Waternberg, N., Waiserberg, N., Zuk, L., & Lerman-Sagie, T. (2007). Developmental  
552 coordination disorder in children with attention-deficit-hyperactivity disorder and  
553 physical therapy intervention. *Developmental Medicine and Child Neurology*, *49*(12),  
554 920–925. <https://doi.org/10.1111/j.1469-8749.2007.00920.x>
- 555 Wechsler, D. (1999). WASI: Wechsler abbreviated scale of intelligence. In *WASI*.  
556 Psychological Corporation.



- 557 Wilson, B. N., Crawford, S. G., Green, D., Roberts, G., Aylott, A., & Kaplan, B. J. (2009).  
558 Psychometric properties of the revised Developmental Coordination Disorder  
559 Questionnaire. *Physical & Occupational Therapy in Pediatrics*, 29(2), 182–202.  
560 <https://doi.org/10.1080/01942630902784761>
- 561 Wilson, M. (2002). Six views of embodied cognition. *Psychonomic Bulletin & Review*, 9(4),  
562 625–636. <https://doi.org/10.3758/BF03196322>
- 563 Wilson, P. H., Ruddock, S., Smits-Engelsman, B., Polatajko, H., & Blank, R. (2013).  
564 Understanding performance deficits in developmental coordination disorder: a  
565 meta-analysis of recent research. *Developmental Medicine and Child Neurology*,  
566 55(3), 217–228. <https://doi.org/10.1111/j.1469-8749.2012.04436.x>
- 567
- 568

569 Table 1. Demographic and summary statistics of participants

|                         | ND-CNV (N=169)        | Control (N=72)         | p value             |
|-------------------------|-----------------------|------------------------|---------------------|
| <b>Income</b>           |                       |                        |                     |
| N-Miss                  | 18                    | 16                     |                     |
| <=£19,999               | 59 (39.1%)            | 12 (21.4%)             |                     |
| £20,000 - £39,999       | 49 (32.5%)            | 27 (48.2%)             |                     |
| £40,000 - £59,999       | 22 (14.6%)            | 8 (14.3%)              |                     |
| £60,000 +               | 21 (13.9%)            | 9 (16.1%)              |                     |
| <b>Education</b>        |                       |                        |                     |
| N-Miss                  | 5                     | 10                     |                     |
| High                    | 45 (27.4%)            | 16 (25.8%)             |                     |
| Low                     | 40 (24.4%)            | 17 (27.4%)             |                     |
| Middle                  | 70 (42.7%)            | 28 (45.2%)             |                     |
| No School Leaving Exams | 9 (5.5%)              | 1 (1.6%)               |                     |
| <b>Ethnicity</b>        |                       |                        |                     |
| N-Miss                  | 6                     | 10                     |                     |
| European                | 150 (92.0%)           | 56 (90.3%)             |                     |
| Other                   | 13 (8.0%)             | 6 (9.7%)               |                     |
| <b>Age</b>              |                       |                        | < .001 <sup>2</sup> |
| N-Miss                  | 0                     | 0                      |                     |
| Median (Q1, Q3)         | 8.877 (7.116, 10.958) | 10.408 (8.801, 12.364) |                     |
| Range                   | 6.016 - 14.810        | 5.894 - 14.753         |                     |
| <b>Gender</b>           |                       |                        | .062 <sup>1</sup>   |
| N-Miss                  | 0                     | 0                      |                     |
| M                       | 113 (66.9%)           | 39 (54.2%)             |                     |
| F                       | 56 (33.1%)            | 33 (45.8%)             |                     |
| <b>Premature</b>        |                       |                        | .010 <sup>1</sup>   |
| N-Miss                  | 11                    | 7                      |                     |
| No                      | 72 (45.6%)            | 42 (64.6%)             |                     |
| Yes                     | 86 (54.4%)            | 23 (35.4%)             |                     |
| <b>CHD</b>              |                       |                        | .008 <sup>1</sup>   |
| N-Miss                  | 6                     | 2                      |                     |

|                               | <b>ND-CNV (N=169)</b>   | <b>Control (N=72)</b>   | <b>p value</b>      |
|-------------------------------|-------------------------|-------------------------|---------------------|
| No                            | 139 (85.3%)             | 68 (97.1%)              |                     |
| Yes                           | 24 (14.7%)              | 2 (2.9%)                |                     |
| <b>Epilepsy</b>               |                         |                         | < .001 <sup>1</sup> |
| N-Miss                        | 5                       | 2                       |                     |
| No                            | 138 (84.1%)             | 70 (100.0%)             |                     |
| Yes                           | 26 (15.9%)              | 0 (0.0%)                |                     |
| <b>DCDQ Score</b>             |                         |                         | < .001 <sup>2</sup> |
| N-Miss                        | 0                       | 0                       |                     |
| Median (Q1, Q3)               | 32.000 (25.000, 41.000) | 69.500 (58.500, 74.000) |                     |
| Range                         | 15.000 - 73.000         | 19.000 - 75.000         |                     |
| <b>FSIQ</b>                   |                         |                         | < .001 <sup>3</sup> |
| N-Miss                        | 12                      | 3                       |                     |
| Mean (SD)                     | 81.898 (14.997)         | 99.246 (12.838)         |                     |
| Range                         | 51.000 - 128.000        | 70.000 - 139.000        |                     |
| <b>PIQ</b>                    |                         |                         | < .001 <sup>3</sup> |
| N-Miss                        | 12                      | 3                       |                     |
| Mean (SD)                     | 86.146 (15.276)         | 101.681 (13.376)        |                     |
| Range                         | 54.000 - 132.000        | 75.000 - 131.000        |                     |
| <b>VIQ</b>                    |                         |                         | < .001 <sup>3</sup> |
| N-Miss                        | 11                      | 3                       |                     |
| Mean (SD)                     | 80.835 (15.306)         | 97.130 (14.214)         |                     |
| Range                         | 55.000 - 123.000        | 63.000 - 141.000        |                     |
| <b>ADHD Symptom Count</b>     |                         |                         | < .001 <sup>2</sup> |
| N-Miss                        | 0                       | 0                       |                     |
| Median (Q1, Q3)               | 6.000 (2.000, 11.000)   | 0.000 (0.000, 1.000)    |                     |
| Range                         | 0.000 - 17.000          | 0.000 - 17.000          |                     |
| <b>ASD Trait Scores</b>       |                         |                         | < .001 <sup>2</sup> |
| N-Miss                        | 0                       | 0                       |                     |
| Median (Q1, Q3)               | 18.000 (11.000, 23.000) | 3.000 (2.000, 6.000)    |                     |
| Range                         | 0.000 - 33.000          | 0.000 - 34.000          |                     |
| <b>Anxiety Symptom Counts</b> |                         |                         | < .001 <sup>2</sup> |
| N-Miss                        | 0                       | 0                       |                     |

|                          | <b>ND-CNV (N=169)</b> | <b>Control (N=72)</b> | <b>p value</b>               |
|--------------------------|-----------------------|-----------------------|------------------------------|
| Median (Q1, Q3)          | 2.000 (0.000, 8.000)  | 0.000 (0.000, 1.000)  |                              |
| Range                    | 0.000 - 25.000        | 0.000 - 17.000        |                              |
| <b>ODD Symptom Count</b> |                       |                       | <b>&lt; .001<sup>2</sup></b> |
| N-Miss                   | 0                     | 0                     |                              |
| Median (Q1, Q3)          | 2.000 (1.000, 4.000)  | 0.000 (0.000, 2.000)  |                              |
| Range                    | 0.000 - 7.000         | 0.000 - 6.000         |                              |

- 570 1. Pearson's Chi-squared test  
571 2. Kruskal-Wallis rank sum test  
572 3. Linear Model ANOVA

573

574 Table 2. Regression results for DCDQ score predicted by A) ADHD symptom counts, B) ASD  
 575 traits, C) Anxiety Symptoms, D) Oppositional defiant Disorder (ODD) symptoms, with age as  
 576 a covariate.

| <b>A)</b>                                |             |               |                 |
|------------------------------------------|-------------|---------------|-----------------|
| <b>DCDQ Score</b>                        |             |               |                 |
| <i>Predictors</i>                        | $\beta$     | <i>95% CI</i> | <i>p</i>        |
| Age                                      | .20         | .05 – .34     | <b>.009</b>     |
| ADHD symptom count                       | -.18        | -.32 – -.03   | <b>.021</b>     |
| Observations                             | 169         |               |                 |
| R <sup>2</sup> / adjusted R <sup>2</sup> | .078 / .067 |               |                 |
| <b>B)</b>                                |             |               |                 |
| <b>DCDQ Score</b>                        |             |               |                 |
| <i>Predictors</i>                        | $\beta$     | <i>95% CI</i> | <i>p</i>        |
| Age                                      | .16         | .02 – .29     | <b>.021</b>     |
| ASD Traits                               | -.46        | -.59 – -.32   | <b>&lt;.001</b> |
| Observations                             | 169         |               |                 |
| R <sup>2</sup> / adjusted R <sup>2</sup> | .252 / .243 |               |                 |
| <b>C)</b>                                |             |               |                 |
| <b>DCDQ Score</b>                        |             |               |                 |
| <i>Predictors</i>                        | $\beta$     | <i>95% CI</i> | <i>p</i>        |
| Age                                      | .22         | .07 – .37     | <b>.004</b>     |
| Anxiety symptom count                    | -.11        | -.26 – .04    | .152            |
| Observations                             | 169         |               |                 |
| R <sup>2</sup> / adjusted R <sup>2</sup> | .059 / .048 |               |                 |
| <b>D)</b>                                |             |               |                 |
| <b>DCDQ Score</b>                        |             |               |                 |
| <i>Predictors</i>                        | $\beta$     | <i>95% CI</i> | <i>p</i>        |
| Age                                      | .22         | .07 – .37     | <b>.004</b>     |
| ODD symptom count                        | .02         | -.13 – .17    | .767            |
| Observations                             | 169         |               |                 |
| R <sup>2</sup> / adjusted R <sup>2</sup> | .048 / .036 |               |                 |

580  
 581

582  
583  
584  
585  
586  
587  
588

Table 3. Results of mediation analysis on the effect of having an ND-CNV on A) ADHD symptom counts, B) ASD traits, C) Anxiety symptoms, D) ODD symptoms with coordination ability as a mediator. Average Causal Mediation Effects corresponds to the indirect effect through coordination ability, while Average Direct effects corresponds to the direct effect of having an ND-CNV on the psychopathology variable of interest.

| <b>A) ADHD symptom counts</b>    | <b>Estimates</b> | <b>Lower 95% CI</b> | <b>Upper 95% CI</b> | <b>p</b>        |
|----------------------------------|------------------|---------------------|---------------------|-----------------|
| Average Causal Mediation Effects | 2.54             | 1.04                | 4.24                | <b>.001</b>     |
| Average Direct Effects           | 2.39             | .13                 | 4.44                | <b>.042</b>     |
| Total Effects                    | 4.93             | 3.67                | 6.10                | <b>&lt;.001</b> |
| Prop.Mediated                    | .51              | .20                 | .97                 | <b>.001</b>     |
| <b>B) ASD traits</b>             | <b>Estimates</b> | <b>Lower 95% CI</b> | <b>Upper 95% CI</b> | <b>p</b>        |
| Average Causal Mediation Effects | 8.13             | 6.14                | 10.44               | <b>&lt;.001</b> |
| Average Direct Effects           | 4.14             | 1.16                | 6.95                | <b>.005</b>     |
| Total Effects                    | 12.27            | 10.44               | 14.06               | <b>&lt;.001</b> |
| Prop.Mediated                    | .66              | .48                 | .90                 | <b>&lt;.001</b> |
| <b>C) Anxiety symptom counts</b> | <b>Estimates</b> | <b>Lower 95% CI</b> | <b>Upper 95% CI</b> | <b>p</b>        |
| Average Causal Mediation Effects | 1.84             | .35                 | 3.45                | <b>.012</b>     |
| Average Direct Effects           | .81              | -1.24               | 2.79                | .428            |
| Total Effects                    | 2.65             | 1.42                | 3.89                | <b>&lt;.001</b> |
| Prop.Mediated                    | .69              | .12                 | 1.71                | <b>.012</b>     |
| <b>D) ODD symptom counts</b>     | <b>Estimates</b> | <b>Lower 95% CI</b> | <b>Upper 95% CI</b> | <b>p</b>        |
| Average Causal Mediation Effects | .27              | -.26                | .80                 | .304            |
| Average Direct Effects           | .91              | .16                 | 1.66                | <b>.017</b>     |
| Total Effects                    | 1.18             | .70                 | 1.64                | <b>&lt;.001</b> |
| Prop.Mediated                    | .23              | -.22                | .82                 | .304            |

589  
590

591 Table 4. Results of mediation analysis on the effect of having an ND-CNV on A) Full Scale IQ  
 592 B) Performance IQ, C) Verbal IQ with coordination ability as a mediator. Average Causal  
 593 Mediation Effects corresponds to the indirect effect through coordination ability, while  
 594 Average Direct effects corresponds to the direct effect of having an ND-CNV on the  
 595 psychopathology variable of interest.

596

| <b>A) FSIQ</b>                   | <b>Estimates</b> | <b>Lower 95% CI</b> | <b>Upper 95% CI</b> | <b>p</b>        |
|----------------------------------|------------------|---------------------|---------------------|-----------------|
| Average Causal Mediation Effects | -7.12            | -12.17              | -2.58               | <b>.002</b>     |
| Average Direct Effects           | -10.86           | -17.06              | -4.81               | <b>&lt;.001</b> |
| Total Effects                    | -17.98           | -22.02              | -13.98              | <b>&lt;.001</b> |
| Prop.Mediated                    | .40              | .14                 | .70                 | <b>.002</b>     |
| <b>B) PIQ</b>                    | <b>Estimates</b> | <b>Lower 95% CI</b> | <b>Upper 95% CI</b> | <b>p</b>        |
| Average Causal Mediation Effects | -6.68            | -11.79              | -2.08               | <b>.005</b>     |
| Average Direct Effects           | -9.89            | -16.03              | -3.39               | <b>.005</b>     |
| Total Effects                    | -16.57           | -20.76              | -12.39              | <b>&lt;.001</b> |
| Prop.Mediated                    | .40              | .12                 | .76                 | <b>.005</b>     |
| <b>C) VIQ</b>                    | <b>Estimates</b> | <b>Lower 95% CI</b> | <b>Upper 95% CI</b> | <b>p</b>        |
| Average Causal Mediation Effects | -6.21            | -11.14              | -1.81               | <b>.006</b>     |
| Average Direct Effects           | -10.28           | -16.66              | -3.75               | <b>.004</b>     |
| Total Effects                    | -16.49           | -20.71              | -12.18              | <b>&lt;.001</b> |
| Prop.Mediated                    | .38              | .11                 | .74                 | <b>.006</b>     |

597

598

599 Figure 1. *The mediation model we tested to investigate the associations between ND-CNV*  
600 *status (0=sibling control; 1=ND-CNV) and outcome, via a direct (Path C) and indirect*  
601 *pathway (A-B). Pathways A-B estimate to what extent the link between CNV status and*  
602 *outcome can be accounted for by an indirect link via coordination ability (Developmental*  
603 *Coordination Disorder Questionnaire Score) mediator.*

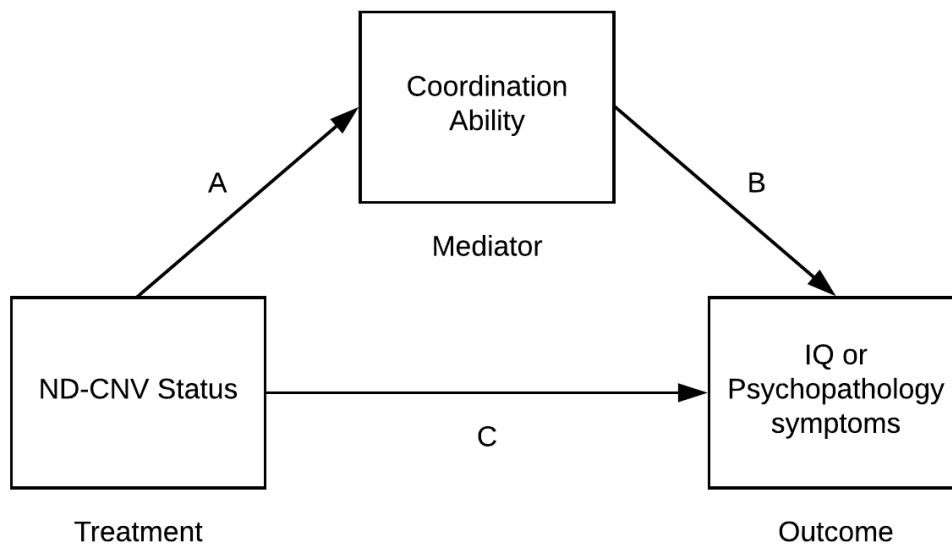

604
